# Supplementary material for: Association of Temperament With Preoperative Anxiety in Pediatric Patients Undergoing Surgery: A Systematic Review and Meta-analysis
Source: PubMed Central journal article supplement (PMC6563582; doi:10.1001/jamanetworkopen.2019.5614), 2019-06-07
Supplement: jamanetwopen-2-e195614-s001.pdf [file jamanetwopen-2-e195614-s001.pdf]

## Supplementary Online Content

Chow CHT, Rizwan A, Xu R, et al. Association of temperament with preoperative anxiety in pediatric patients undergoing surgery: a systematic review and meta-analysis. *JAMA Netw Open*. 2019;2(6):e195614. doi:10.1001/jamanetworkopen.2019.5614

**eAppendix.** MEDLINE Search Strategy

**eFigure.** Risk of Bias Assessment for Randomized Clinical Trials

**eTable.** Risk of Bias Assessment for Observational Studies

This supplementary material has been provided by the authors to give readers additional information about their work.

## eAppendix: MEDLINE Search Strategy

1. Anxiety/
2. anxiety.mp.
3. anxiet\*.mp.
4. anxious.mp.
5. nervousness.mp.
6. Fear/
7. fear.mp.
8. Panic/
9. panicked.mp.
10. distress.mp.
11. emotional stress.mp.
12. Stress, Psychological/
13. psychological stress.mp.
14. feel\* of apprehension.mp.
15. feel\* of dread.mp.
16. feel\* of worry.mp.
17. feel\* of worried.mp.
18. feel\* of terror.mp.
19. 1 or 2 or 3 or 4 or 5 or 6 or 7 or 8 or 9 or 10 or 11 or 12 or 13 or 14 or 15 or 16 or 17 or 18
20. Preoperative Care/
21. Preoperative Period/
22. preoperative.mp.
23. surgical procedures.mp.
24. Surgical Procedures, Operative/
25. operative.mp.
26. surgery.mp.
27. surgical.mp.
28. preop\*.mp.
29. pre-op\*.mp.
30. pre-op.mp.
31. periop\*.mp.
32. peri-op\*.mp.
33. preoperat\*.mp.
34. Temperament/
35. temperament.mp.
36. Personality/
37. personality.mp.
38. shyness/
39. shyness.mp.
40. sociability.mp.
41. emotionality.mp.
42. impulsivity.mp.
43. "Inhibition (Psychology)"/

- 44. inhibition.mp.
- 45. soothability.mp.
- 46. attention span-persistence.mp.
- 47. 34 or 35 or 36 or 37 or 38 or 39 or 40 or 41 or 42 or 43 or 44 or 45 or 46
- 48. 20 or 21 or 22 or 23 or 24 or 25 or 26 or 27 or 28 or 29 or 30 or 31 or 32 or 33
- 49. 19 and 47 and 48

**eFigure.** Risk of Bias Assessment for Randomized Clinical Trials

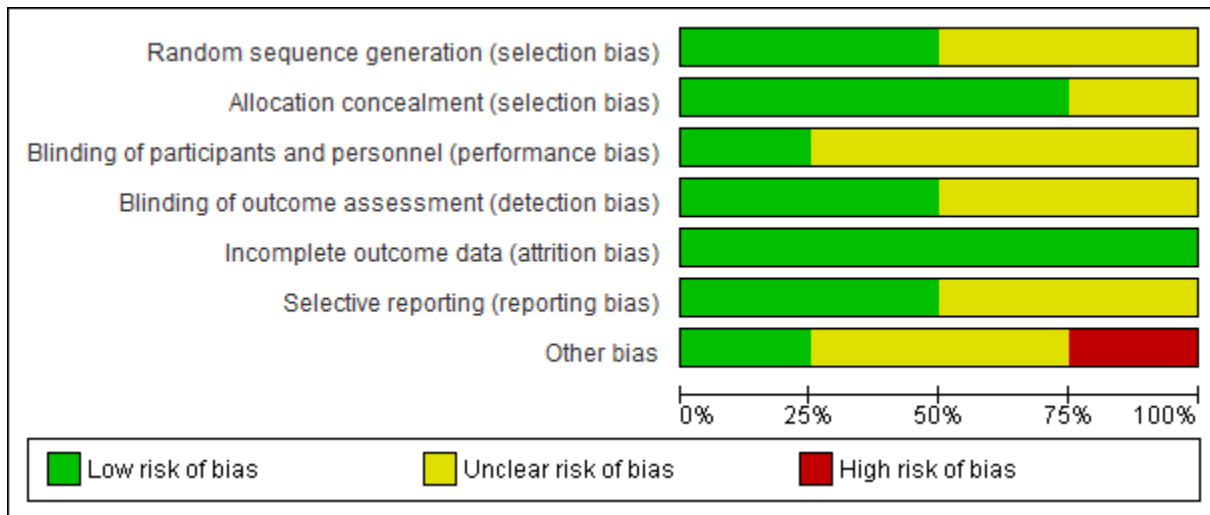

**eTable.** Risk of Bias Assessment for Observational Studies

| <b>Study authors</b> | <b>Year, country</b> | <b>Selection</b> | <b>Comparability</b> | <b>Outcome</b> | <b>Total Score</b> |
|----------------------|----------------------|------------------|----------------------|----------------|--------------------|
| Carson et al.        | 1991, USA            | 2                | 2                    | 1              | 5                  |
| Chow et al.          | 2017, Canada         | 2                | 1                    | 2              | 5                  |
| Davidson et al.      | 2006, Australia      | 2                | 1                    | 2              | 5                  |
| Fernandes& Arriaga   | 2010, Portugal       | 3                | 2                    | 1              | 6                  |
| Fortier et al.       | 2009, USA            | 2                | 1                    | 2              | 5                  |
| Fortier et al.       | 2010, USA            | 3                | 2                    | 2              | 7                  |
| Fortier et al.       | 2011, USA            | 2                | 2                    | 2              | 6                  |
| Glazebrook et al.    | 1994, England        | 2                | 0                    | 3              | 5                  |
| Kain et al.          | 1996a, USA           | 2                | 2                    | 1              | 5                  |
| Kain et al.          | 1996c, USA           | 2                | 1                    | 2              | 5                  |
| Kain et al.          | 2000, USA            | 2                | 2                    | 2              | 6                  |
| Kain et al.          | 2004, USA            | 2                | 2                    | 2              | 6                  |
| Kain et al.          | 2006a, USA           | 2                | 1                    | 2              | 5                  |
| Kain et al.          | 2006b, USA           | 2                | 1                    | 2              | 5                  |

|                 |              |   |   |   |   |
|-----------------|--------------|---|---|---|---|
| Kain et al.     | 2007, USA    | 2 | 2 | 2 | 6 |
| MacLaren&Kain   | 2007, USA    | 2 | 1 | 3 | 6 |
| Quinonez et al. | 1997, Canada | 2 | 2 | 2 | 6 |
| Wright et al.   | 2013, Canada | 2 | 2 | 3 | 7 |
| Wright et al.   | 2017, Canada | 2 | 2 | 2 | 6 |
